# Supplementary material for: Preservation of urine specimens for metabolic evaluation of recurrent urinary stone formers
Source: publisher site journal article supplement (doi:10.1515/cclm-2024-0773), 2024-07-28
Supplement: Supplementary file 1 [file j_cclm-2024-0773_suppl_001.docx]

**SUPPLEMENTAL TABLE AND FIGURE**

**Preservation of urine collection for metabolic evaluation of recurrent urinary stone formers.**

Tomáš Šálek1,2, Pavel Musil1, Pieter Vermeersh3, Rachel Marrington4, Zeliha Gunnur Dikmen5, Radka Poláchová1, Ulrike Kipman6, Timo T. Kouri7§, and Janne Cadamuro8§,

**Supplemental Table 1.**

**Measurement procedures on AbbottTM ArchitectTM *ci*16200 analyser and Lumex CAPEL-205 capillary electrophoresis. a**

| **Measurand** | | **Assay application and reagent** | | **Assay principle** | | **Calibrator** | | **Standard uncertainty of calibrator (k=1)** | | **Day-to-day imprecision b,**  **target value (mmol/L), *CVA* (%)** | | **Relative bias (%)** | | **Intermediate**  **reproducibility,**  **mean *CVA* of the two levels (%)** | |
| --- | --- | --- | --- | --- | --- | --- | --- | --- | --- | --- | --- | --- | --- | --- | --- |
| Sodium | | Na-CU  ARCHITECT cSystems ICT, ICT Sample Diluent | | Indirect ISE | | ICT Urine Calibrator | | 0.37%  at 180 mmol/L | | 63.3 mmol/L, 1.17%  207 mmol/L, 0.84% | | 1.96%  0.24% | | 1.01% | |
| Potassium | | K-CU  ARCHITECT cSystems ICT, ICT Sample Diluent | | Indirect ISE | | ICT Urine Calibrator | | 0.74%  at 90 mmol/L | | 29.9 mmol/L, 0.89%  133 mmol/L, 0.83% | | 1.66%  0.14% | | 0.86% | |
| Chloride | | Cl-CU  ARCHITECT cSystems ICT, ICT Sample Diluent | | Indirect ISE | | ICT Urine Calibrator | | 0.37%  at 180 mmol/L | | 82.0 mmol/L, 0.91%  272 mmol/L, 1.28% | | 3.37%  1.20% | | 1.10% | |
| Creatinine | | CrEnzU  Creatinine (Enzymatic) | | Spectrophotometry  Creatinase | | Clin Chem Cal | | 0.55%  at 0.48 mmol/L | | 7.02 mmol/L, 1.48%  16.0 mmol/L, 1.50% | | 1.24%  1.23% | | 1.49% | |
| Calcium | | CaCU  Calcium | | Spectrophotometry  Arsenazo III | | Multiconstituent Calibrator | | 0.2%  at 3 mmol/L | | 1.53 mmol/L, 1.94%  4.21 mmol/L, 1.84% | | 4.08%  6.05% | | 1.89% | |
| Magnesium | | MAGU  Magnesium | | Spectrophotometry  Isocitrate dehydrogenase | | Multiconstituent Calibrator | | 0.21%  at 1.93 mmol/L | | 3.09 mmol/L, 2.28%  13.1 mmol/L, 2.14% | | 5.96%  2.38% | | 2.21% | |
| Phosphate | | Phos-U  Phosphorus | | Spectrophotometry  Phosphomolybdate | | Multiconstituent Calibrator | | 0.17%  at 2.54 mmol/L | | 9.00 mmol/L, 2.16%  26.8 mmol/L, 1.18% | | 1.22%  0.82% | | 1.67% | |
| Uric acid | | Uric2-U  Uric Acid2 | | Spectrophotometry  Uricase | | Consolidated Chemistry Calibrator | | 0.22%  at 0.55 mmol/L | | 0.702 mmol/L, 2.16%  1.21 mmol/L, 1.58% | | 4.56%  2.84% | | 1.87% | |
| Oxalate | | Capillary  electrophoresis | | Indirect UV detection | | Ammonium oxalate monohydrate | | 1.2%  at 1.00 mmol/L | | 0.201 mmol/L (3.87)b  0.484 mmol/L (3.81)b | | 0.97%  2.95% | | 3.84% | |
| Citrate | | Capillary  electrophoresis | | Indirect UV detection | | Sodium citrate dihydrate | | 2.0%  at 6.00 mmol/L | | 1.200 mmol/L (4.02)b  3.00 mmol/L (3.47)b | | 2.06%  2.69% | | 3.75% | |

a Abbreviations in the names of materials of the AbbottTM ArchitectTM analyzers represent the commercial names of those products.
b Randox Assayed Urine Controls (Crumlin, UK; on AbbottTM ArchitectTM), or in-house solutions (from Penta s.r.o, Prague, Czech Republic; on Lumex CAPEL-205 capillary electrophoresis) were measured once on each working day during the study, to calculate an intermediate reproducibility of 580 consecutive measurements*. CVA* = coefficient of analytical variation.


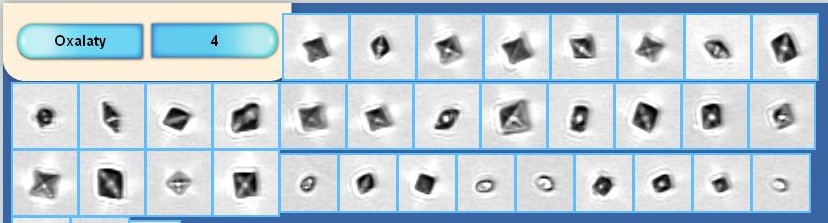


**Supplemental Figure 1**: Typical oxalate crystals in the urine sample of one patient. Both octahedral calcium oxalate-dihydrate (COD) and round-shaped calcium oxalate monohydrate (COM) crystals were detected quantitatively by the iQ200 instrument, as confirmed by visual microscopy.
